# Supplementary material
Source: publisher site journal article supplement (https://www.dovepress.com/get_supplementary_file.php?f=469769.docx)
Supplement: Supplementary file 1 [file get_supplementary_file.php]

## **Supplementary Information**

**Supplementary Table 1** ICD-9-CM and ICD-10-CM Diagnosis Codes for Liver Disease

| **ICD-9-CM code** | **Code description** |
| --- | --- |
| **571** | Chronic liver disease and cirrhosis |
| **571.4** | Chronic hepatitis |
| **571.40** | Chronic hepatitis, unspecified |
| **571.49** | Other chronic hepatitis |
| **571.5** | Cirrhosis of liver without mention of alcohol |
| **572.3** | Portal hypertension |
| **572.4** | Hepatorenal syndrome |
| **573.5** | Hepatopulmonary syndrome |
| **572.8** | Other sequelae of chronic liver disease |
| **571.8** | Other chronic nonalcoholic liver disease |
| **571.9** | Unspecified chronic liver disease without mention of alcohol |
| **573.8** | Other specified disorders of liver |
| **573.9** | Unspecified disorder of liver |
| **789.1** | Hepatomegaly |
| **774.4** | Perinatal jaundice due to hepatocellular damage |
| **782.4** | Jaundice, unspecified, not of newborn |
| **ICD-10-CM code** | **Code description** |
| **K70.4** | Alcoholic hepatic failure |
| **K70.40** | Alcoholic hepatic failure without coma |
| **K70.41** | Alcoholic hepatic failure with coma |
| **K71.8** | Toxic liver disease with other disorders of liver |
| **K72** | Hepatic failure, not elsewhere classified |
| **K72.0** | Acute and subacute hepatic failure |
| **K72.00** | Acute and subacute hepatic failure without coma |
| **K72.01** | Acute and subacute hepatic failure with coma |
| **K72.1** | Chronic hepatic failure |
| **K72.10** | Chronic hepatic failure without coma |
| **K72.11** | Chronic hepatic failure with coma |
| **K72.9** | Hepatic failure, unspecified |
| **K72.90** | Hepatic failure, unspecified without coma |
| **K72.91** | Hepatic failure, unspecified with coma |
| **K73.8** | Other chronic hepatitis, not elsewhere classified |
| **K73.9** | Chronic hepatitis, unspecified |
| **K74** | Fibrosis and cirrhosis of liver |
| **K74.0** | Hepatic fibrosis |
| **K74.00** | Hepatic fibrosis, unspecified |
| **K74.01** | Hepatic fibrosis, early fibrosis |
| **K74.02** | Hepatic fibrosis, advanced fibrosis |
| **K74.6** | Other and unspecified cirrhosis of liver |
| **K74.60** | Unspecified cirrhosis of liver |
| **K74.69** | Other cirrhosis of liver |
| **K75** | Other inflammatory liver diseases |
| **K75.8** | Other specified inflammatory liver diseases |
| **K75.81** | Nonalcoholic steatohepatitis (NASH) |
| **K75.89** | Other specified inflammatory liver diseases |
| **K75.9** | Inflammatory liver disease, unspecified |
| **K76.0** | Fatty (change of) liver, not elsewhere classified |
| **K76.6** | Portal hypertension |
| **K76.7** | Hepatorenal syndrome |
| **K76.81** | Hepatopulmonary syndrome |
| **K76.9** | Liver disease, unspecified |
| **K77** | Liver disorders in diseases classified elsewhere |
| **R16.0** | Hepatomegaly, not elsewhere classified |
| **R16.2** | Hepatomegaly with splenomegaly, not elsewhere classified |
| **P59.2** | Neonatal jaundice from other and unspecified hepatocellular damage |
| **P59.20** | Neonatal jaundice from unspecified hepatocellular damage |
| **P59.29** | Neonatal jaundice from other hepatocellular damage |
| **P78.81** | Congenital cirrhosis (of liver) |
| **R17** | Unspecified jaundice |

ICD-9-CM, International Classification of Diseases, Ninth Revision, Clinical Modification; ICD-10-CM, International Classification of Disease, Tenth Revision, Clinical Modification.

**Supplementary Table 2** ICD-9-CM and ICD-10-CM Diagnosis Codes for Lung Disease

| **ICD-9-CM code** | **Code description** |
| --- | --- |
| **466.0** | Acute bronchitis |
| **490** | Bronchitis, not specified as acute or chronic |
| **491** | Chronic bronchitis |
| **491.0** | Simple chronic bronchitis |
| **491.1** | Mucopurulent chronic bronchitis |
| **491.2** | Obstructive chronic bronchitis |
| **491.20** | Obstructive chronic bronchitis without exacerbation |
| **491.21** | Obstructive chronic bronchitis with (acute) exacerbation |
| **491.22** | Obstructive chronic bronchitis with acute bronchitis |
| **491.8** | Other chronic bronchitis |
| **491.9** | Unspecified chronic bronchitis |
| **492** | Emphysema |
| **492.0** | Emphysematous bleb |
| **492.8** | Other emphysema |
| **496** | Chronic airway obstruction, not elsewhere classified |
| **494** | Bronchiectasis |
| **494.0** | Bronchiectasis without acute exacerbation |
| **494.1** | Bronchiectasis with acute exacerbation |
| **518.82** | Other pulmonary insufficiency, not elsewhere classified |
| **518.81** | Acute respiratory failure |
| **518.84** | Acute and chronic respiratory failure |
| **799.1** | Respiratory arrest |
| **493.12** | Intrinsic asthma with (acute) exacerbation |
| **493.22** | Chronic obstructive asthma with (acute) exacerbation |
| **493.92** | Asthma, unspecified type, with (acute) exacerbation |
| **ICD-10-CM code** | **Code description** |
| **J20.9** | Acute bronchitis, unspecified |
| **J40** | Bronchitis, not specified as acute or chronic |
| **J41** | Simple and mucopurulent chronic bronchitis |
| **J41.0** | Simple chronic bronchitis |
| **J41.1** | Mucopurulent chronic bronchitis |
| **J41.8** | Mixed simple and mucopurulent chronic bronchitis |
| **J42** | Unspecified chronic bronchitis |
| **J43** | Emphysema |
| **J43.0** | Unilateral pulmonary emphysema [MacLeod's syndrome] |
| **J43.1** | Panlobular emphysema |
| **J43.2** | Centrilobular emphysema |
| **J43.8** | Other emphysema |
| **J43.9** | Emphysema, unspecified |
| **J44** | Other chronic obstructive pulmonary disease |
| **J44.0** | Chronic obstructive pulmonary disease with (acute) lower respiratory  infection |
| **J44.1** | Chronic obstructive pulmonary disease with (acute) exacerbation |
| **J44.9** | Chronic obstructive pulmonary disease, unspecified |
| **J47** | Bronchiectasis |
| **J47.0** | Bronchiectasis with acute lower respiratory infection |
| **J47.1** | Bronchiectasis with (acute) exacerbation |
| **J47.9** | Bronchiectasis, uncomplicated |
| **J80** | Acute respiratory distress syndrome |
| **J96.0** | Acute respiratory failure |
| **J96.00** | Acute respiratory failure, unspecified whether with hypoxia or hypercapnia |
| **J96.01** | Acute respiratory failure with hypoxia |
| **J96.02** | Acute respiratory failure with hypercapnia |
| **J96.2** | Acute and chronic respiratory failure |
| **J96.20** | Acute and chronic respiratory failure, unspecified whether with hypoxia or hypercapnia |
| **J96.21** | Acute and chronic respiratory failure with hypoxia |
| **J96.22** | Acute and chronic respiratory failure with hypercapnia |
| **J96.9** | Respiratory failure, unspecified |
| **J96.90** | Respiratory failure, unspecified, unspecified whether with hypoxia or  hypercapnia |
| **J96.91** | Respiratory failure, unspecified with hypoxia |
| **J96.92** | Respiratory failure, unspecified with hypercapnia |
| **R06.03** | Acute respiratory distress |
| **R09.2** | Respiratory arrest |
| **J45.21** | Mild intermittent asthma with (acute) exacerbation |
| **J45.901** | Unspecified asthma with (acute) exacerbation |

ICD-9-CM, International Classification of Diseases, Ninth Revision, Clinical Modification; ICD-10-CM, International Classification of Disease, Tenth Revision, Clinical Modification.

**Supplementary Figure 1** Examples of Follow-up Time Contributions to Different Health States During the Continuous Enrollment Period


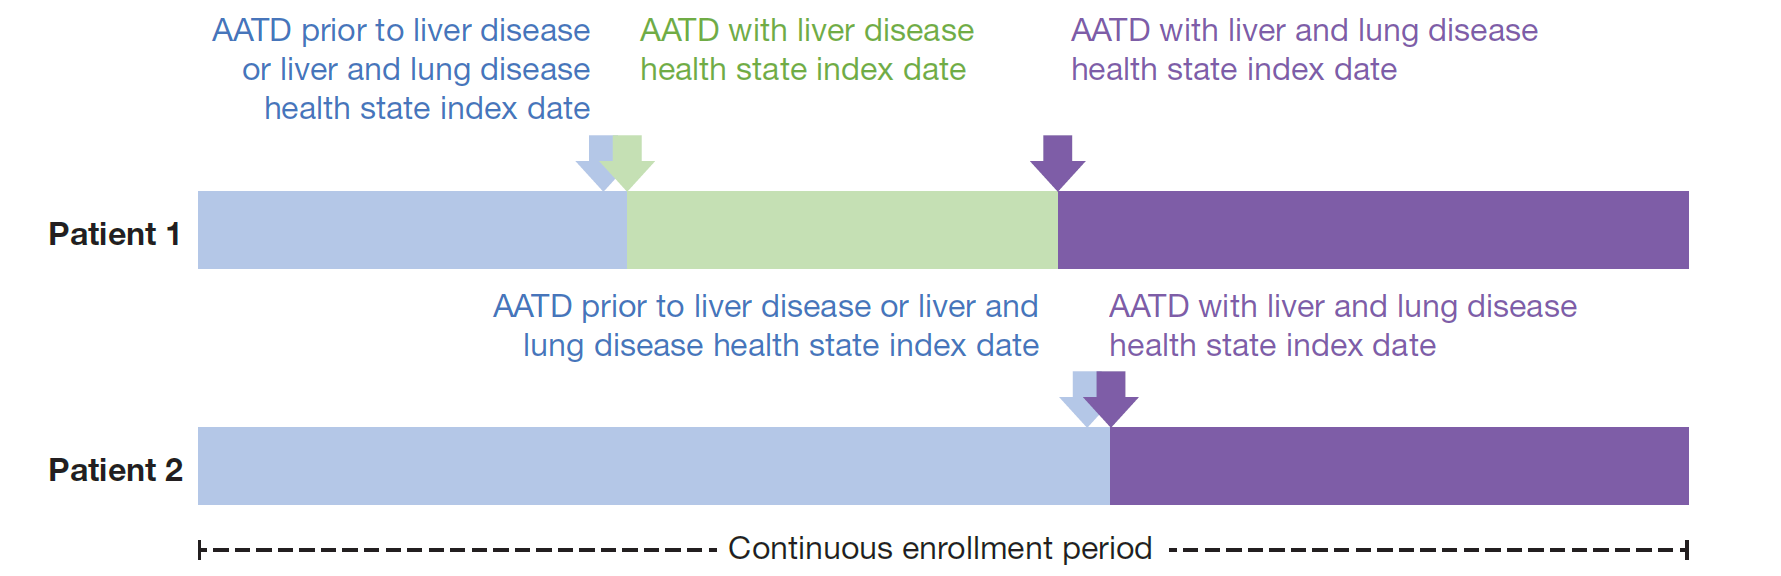


AATD, alpha-1 antitrypsin deficiency.
